# Supplementary material
Source: PubMed Central journal article supplement (PMC5444267)
Supplement: GLYCO_2016_00125R1_SupplementaryData.pdf [file GLYCO_2016_00125R1_SupplementaryData.pdf]

## **Supplementary Data**

***Tannerella forsythia* strains display different cell-surface nonulosonic acids:  
biosynthetic pathway characterization and  
first insight into biological implications**

**Valentin Friedrich, Bettina Janesch, Markus Windwarder, Daniel Maresch,  
Matthias L. Braun, Zoë A. Megson, Evgeny Vinogradov, Marie-France Goneau,  
Ashu Sharma, Friedrich Altmann, Paul Messner, Ian C. Schoenhofen\* and  
Christina Schäffer\***

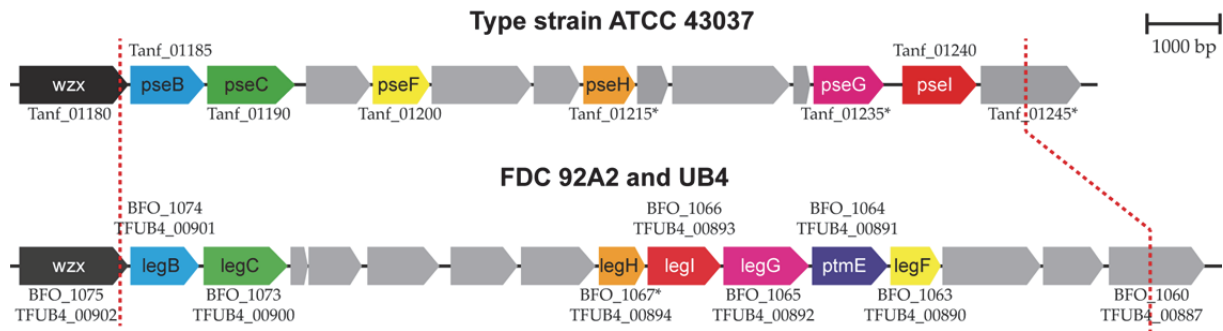

**Supp. Fig. 1. NuO biosynthesis loci of the ATCC 43037 type strain and strains FDC 92A2/UB4 (to scale).** The type strain was found to possess homologs to the genes of six Pse biosynthesis enzymes (PseB, PseC, PseH, PseG, PseI and PseF) (Schoenhofen, I.C., McNally, D.J., et al. 2006a). The genome of strains FDC 92A2 and UB4 are identical (99.83%) in this region and encode gene homologs for the biosynthesis of Leg (LegB, LegC, PglD/LegH, LegG, LegI and LegF), as well as a predicted nucleotidyl transferase (PtmE) for the formation of GDP-GlcNAc, the precursor substrate for this pathway (Schoenhofen, I.C., Vinogradov, E., et al. 2009). Both loci are located downstream of a putative flippase gene (*wzx*) hypothesized to be involved in the general *O*-glycosylation system. The regions within the red dashed lines show no areas of significant similarity. NCBI locus tags for ATCC 43037, FDC 92A2 and UB4 are displayed under each gene, with asterisks denoting ORFs deviating from their NCBI annotation. Grey arrows represent genes predicted to be unrelated to NuO biosynthesis or of unknown function.

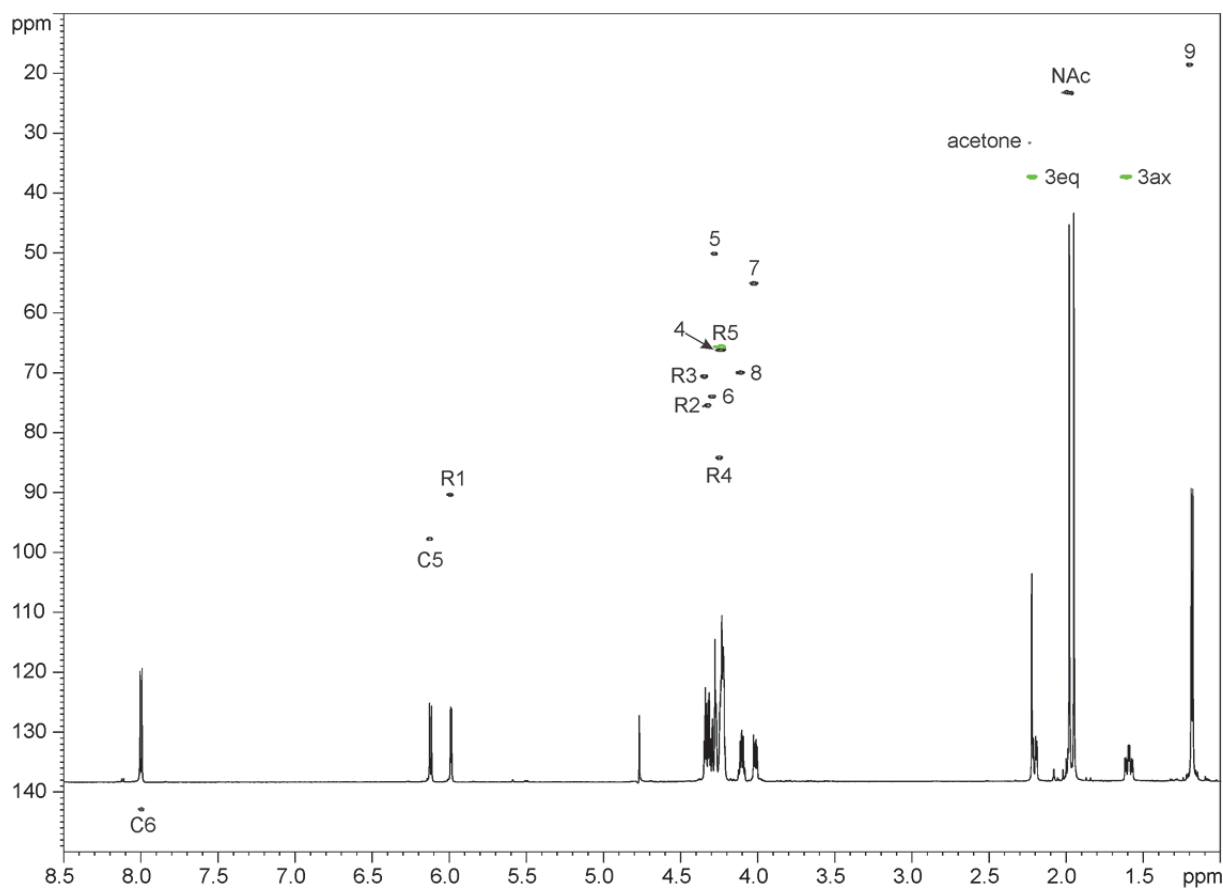

**Supp. Fig. 2. The  $^1\text{H}$  spectrum and  $^1\text{H}$ - $^{13}\text{C}$  HSQC correlation spectrum of CMP-Pse (VII<sub>p</sub>).**

Spectra were recorded on a Varian 600 MHz spectrometer with a Varian 5 mm Z-gradient probe in  $\text{D}_2\text{O}$  at  $25^\circ\text{C}$ . C, cytosine; R, ribose; NAc, 5-NHAc and 7-NHAc  $\text{CH}_3$  regions of pseudaminic acid; and acetone was included as an internal reference.

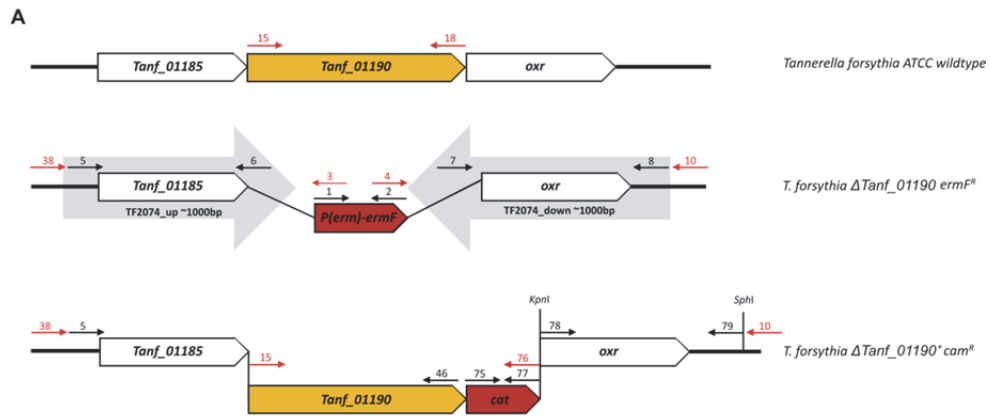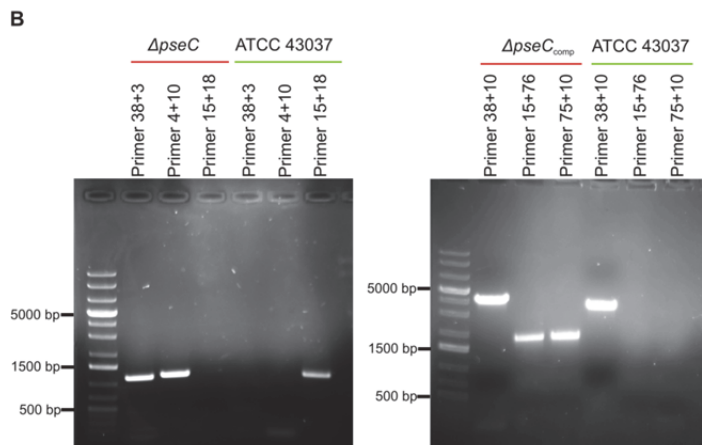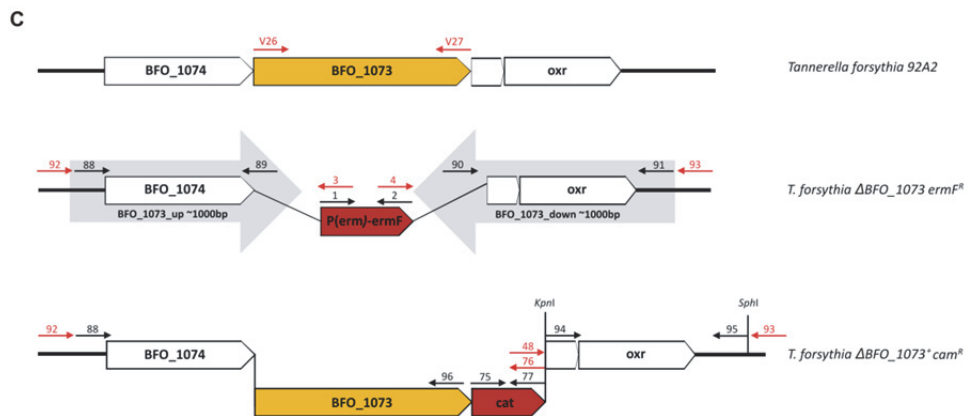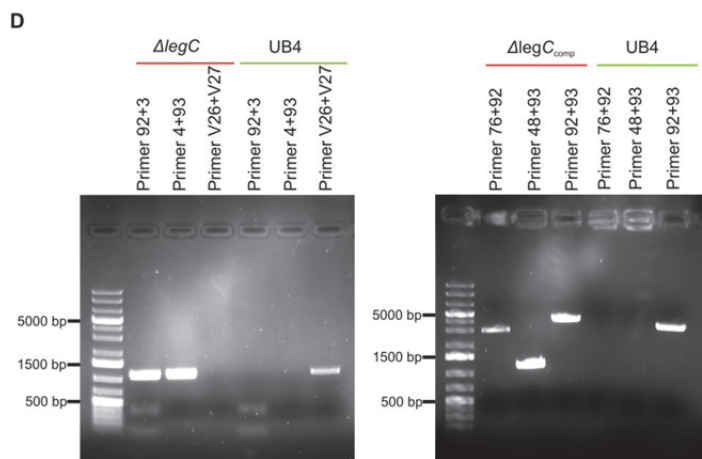

**Supp. Fig. 3. Strategy for Tanf\_01190 and BFO\_1073 gene deletion in *T. forsythia* ATCC 43037 and *T. forsythia* UB4 and confirmation by PCR. (A)** Genomic organization of the *pseC* (Tanf\_01190) gene showing the upstream and downstream homology regions used for homologous recombination and insertion of the selectable *ermF* cassette disrupting Tanf\_01190 (upper lane). Tanf\_01190 gene deletion and insertion of the selectable *ermF* cassette is shown in the context of its genomic region (middle lane). Complementation of the Tanf\_01190 gene deletion by insertion of the Tanf\_01190 gene and the selectable *cat* cassette is shown in the context of its genomic region (lower lane). Primers (compare with Supplemental Table 2) are indicated by arrows. **(B)** Agarose gel electrophoresis (left) to check the deletion of the Tanf\_01190 gene upstream (primers 38/3, 1137 bp), downstream (primers 4/10, 1200 bp) and the loss of the gene (primers 15/18, 1164 bp) genomic DNA of *T. forsythia* ATCC 43037 wild-type and mutants with integrated *ermF* cassette. Agarose gel electrophoresis (right) to check complementation of the deleted Tanf\_01190 gene using the primers 38/10 (4112 bp for *T. forsythia* ATCC 43037  $\Delta$ *pseC* and 3449 bp for *T. forsythia* ATCC 43037 wild-type), primers 15/76 (1815 bp) and primers 75/10 (1838 bp). **(C)** Genomic organization of the *legC* (BFO\_1073) gene showing the upstream and downstream homology regions used for homologous recombination and insertion of the selectable *ermF* cassette disrupting BFO\_1073 (upper lane). BFO\_1073 gene deletion and insertion of the selectable *ermF* cassette is shown in the context of its genomic region (middle lane). Complementation of the BFO\_1073 gene deletion by insertion of the BFO\_1073 gene and the selectable *cat* cassette is shown in the context of its genomic region (lower lane). Primers (compare with Supplemental Table 2) are indicated with arrows. **(D)** Agarose gel electrophoresis (left) to check the deletion of the BFO\_1073 gene upstream (primers 92/3, 1122 bp), downstream (primers 4/93, 1114 bp) and the loss of the gene (primers V26/V27, 1155 bp) genomic DNA of *T. forsythia* UB4 wild-type and mutants with integrated *ermF* cassette. Agarose gel electrophoresis (right) to check complementation of the deleted BFO\_1073 gene using the primers 76/92 (2901 bp), primers 48/93 (1132 bp) and primers 92/93 (4002 bp for *T. forsythia* UB4  $\Delta$ *legC* and 3340 bp for *T. forsythia* UB4 wild-type).

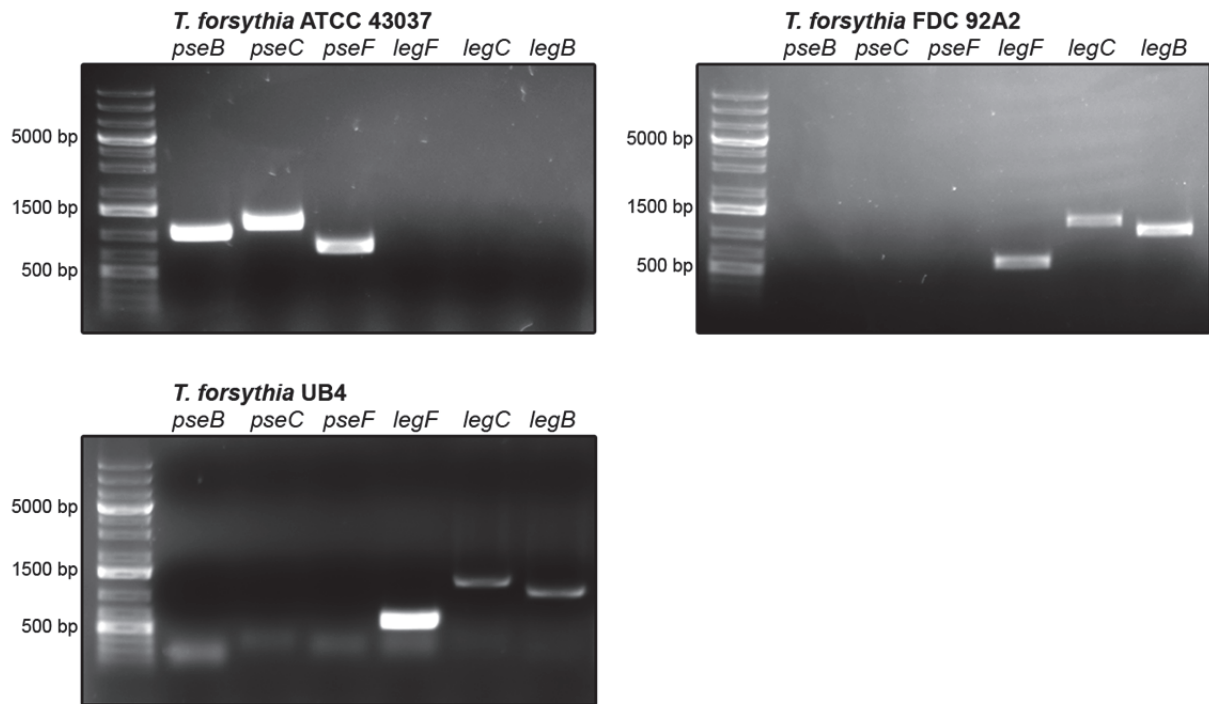

**Supp. Fig. 4: Amplification of selected genes from the Pse or Leg biosynthesis pathways in strains *T. forsythia* ATCC 43037, *T. forsythia* FDC 92A2 and *T. forsythia* UB4. In *T. forsythia* ATCC 43037, only genes of the Pse biosynthesis pathway could be amplified. From genomic DNA of the FDC 92A2 and UB4 strains, only genes from the Leg biosynthesis pathway could be amplified.**

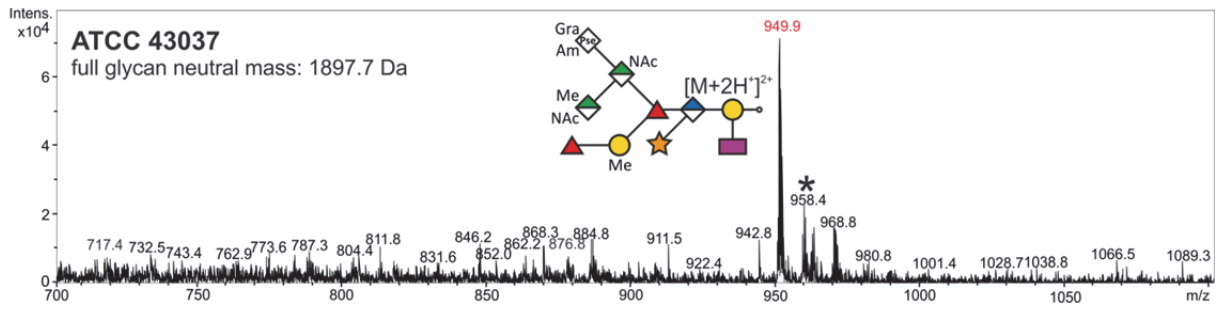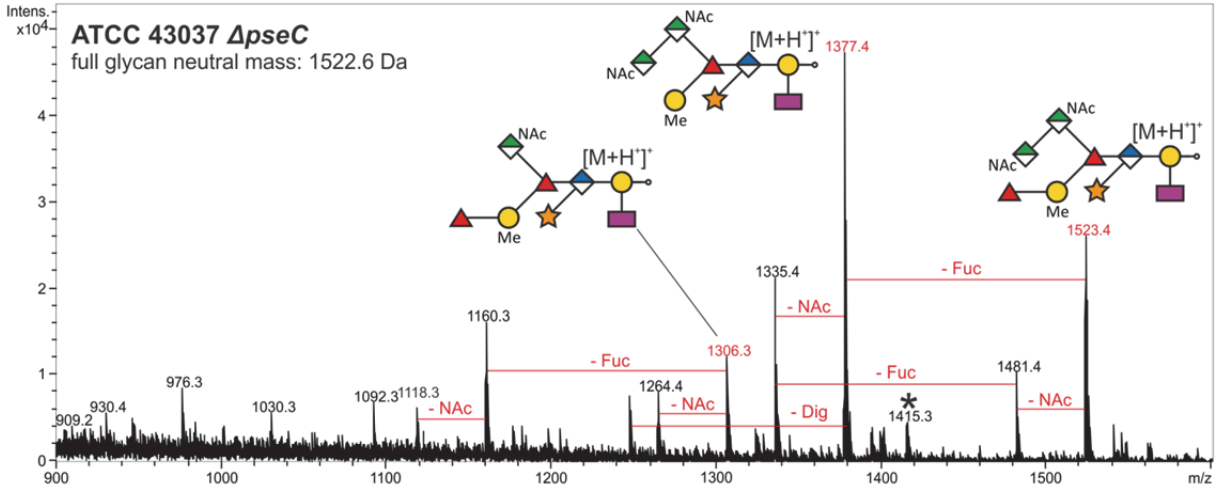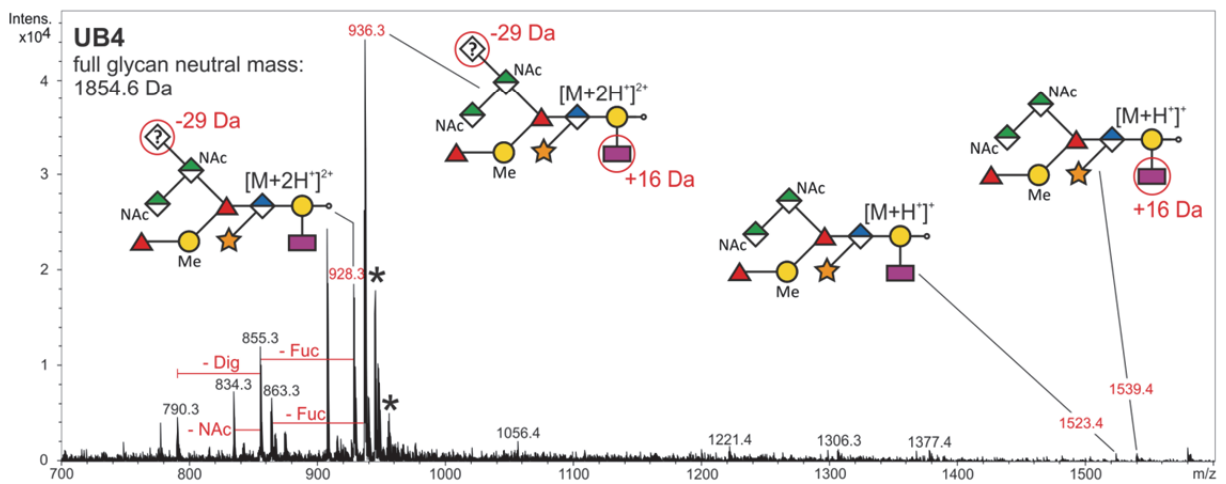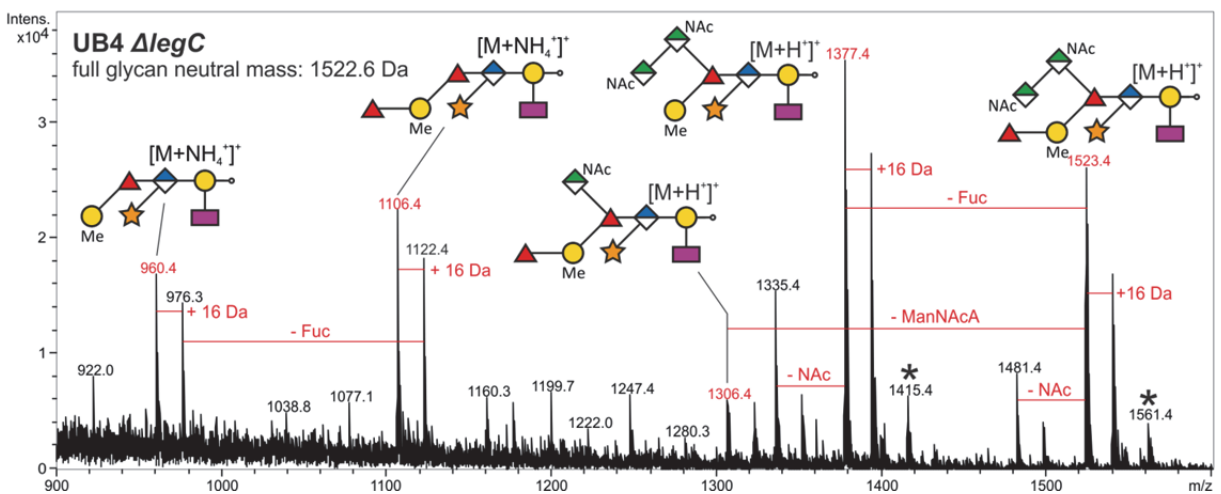

**Supp. Fig. 5. Deconvoluted ESI-TOF positive-mode MS spectrum of TfsA S-layer protein O-glycans in *T. forsythia* ATCC 43037 and UB4 in comparison to the corresponding NulO-negative mutant strains.** Compared to the wild-type glycan of ATCC 43037 (m/z 949.9, neutral mass of 1897.7 Da), the glycan of the  $\Delta pseC$  mutant (m/z 1523.4, neutral mass of 1522.6 Da) was found to lack Pse5Am7Gra (m/z 361.14, neutral mass 379.15 Da) and the methyl group on the terminal ManNAcA. This modification is also missing in the *T. forsythia* UB4 wild-type glycan (m/z 928.3, neutral mass 1854.6 Da), which shows an overall similar composition to the ATCC 43037 wild-type, but with a -29 Da mass difference in the terminal NulO (m/z 332.2, neutral mass 350.3 Da). In addition, full-length and truncated glycans exhibiting +16 Da at the digitoxose position were detected (m/z 936.3, neutral mass 1870.6 Da). As expected, glycans of the UB4  $\Delta legC$  deletion mutant (m/z 1523.4, neutral mass 1522.6 Da) were found to lack the terminal NulO sugar residue and are therefore identical to those of the  $\Delta pseC$  mutant. Asterisks denote adduct peaks. Monosaccharide symbols follow the SNFG (Symbol Nomenclature for Glycans) system (PMID 26543186, Glycobiology 25: 1323–1324, 2015).



**Supp. Table I.** CE-MS data of *T. forsythia* pseudamino acid biosynthetic intermediates produced in this study. Note, we typically do not observe compound V<sub>P</sub> (2,4-diacetamido-2,4,6-trideoxy-L-altropyranose) by this CE-MS analysis, but the expected *m/z* ion for UDP (403.2) was observed for

PseG reactions

| Compound                                                                          | Observed <i>m/z</i> | Calculated mass (Da) | Formula (M)                                                                   | Comments           |
|-----------------------------------------------------------------------------------|---------------------|----------------------|-------------------------------------------------------------------------------|--------------------|
| UDP-GlcNAc (I <sub>P</sub> )                                                      | 606.0               | 607.4                | C <sub>17</sub> H <sub>27</sub> N <sub>3</sub> O <sub>17</sub> P <sub>2</sub> | [M-H] <sup>-</sup> |
| UDP-2-acetamido-2,6-dideoxy-β-L- <i>arabino</i> -hexos-4-ulose (II <sub>P</sub> ) | 588.0               | 589.3                | C <sub>17</sub> H <sub>25</sub> N <sub>3</sub> O <sub>16</sub> P <sub>2</sub> | [M-H] <sup>-</sup> |
| UDP-4-amino-4,6-dideoxy-β-L-AltNAc (III <sub>P</sub> )                            | 589.2               | 590.4                | C <sub>17</sub> H <sub>28</sub> N <sub>4</sub> O <sub>15</sub> P <sub>2</sub> | [M-H] <sup>-</sup> |
| UDP-2,4-diacetamido-2,4,6-trideoxy-β-L-altropyranose (IV <sub>P</sub> )           | 631.4               | 632.4                | C <sub>19</sub> H <sub>30</sub> N <sub>4</sub> O <sub>16</sub> P <sub>2</sub> | [M-H] <sup>-</sup> |
| Pse5,7Ac <sub>2</sub> (VI <sub>P</sub> )                                          | 333.1               | 334.3                | C <sub>13</sub> H <sub>22</sub> N <sub>2</sub> O <sub>8</sub>                 | [M-H] <sup>-</sup> |

**Supp. Table II.** Bacterial strains and plasmids used in this study

| Strain or plasmid                                                   | Genotype and/or relevant characteristics                                                                                                                                                                          | Source          |
|---------------------------------------------------------------------|-------------------------------------------------------------------------------------------------------------------------------------------------------------------------------------------------------------------|-----------------|
| <i>Tannerella forsythia</i> ATCC 43037                              | wild-type isolate                                                                                                                                                                                                 | ATCC            |
| <i>Tannerella forsythia</i> FDC 92A2                                | clinical isolate                                                                                                                                                                                                  | Graham Stafford |
| <i>Tannerella forsythia</i> UB4                                     | clinical isolate                                                                                                                                                                                                  | Ashu Sharma     |
| <i>Escherichia coli</i> DH5 $\alpha$                                | F <sup>-</sup> $\Phi$ 80 <i>lacZ</i> M15 ( <i>lacZYA-argF</i> ) <i>UI69 deoR recA1 endA1 hsdR17</i> (rK <sup>-</sup> mK <sup>-</sup> ) <i>phoA supE44 thi-1 gyrA96 relA1</i>                                      | Invitrogen      |
| <i>Escherichia coli</i> BL21 (DE)                                   | F <sup>-</sup> , <i>ompT</i> , <i>hsdS</i> (rB <sup>-</sup> mB <sup>-</sup> ), <i>gal</i> , <i>dcat</i> (DE3)                                                                                                     | Invitrogen      |
| <i>Escherichia coli</i> BL21-CodonPlus(DE3)-RIL                     | F <sup>-</sup> , <i>ompT</i> , <i>hsdS</i> (rB <sup>-</sup> mB <sup>-</sup> ), <i>dcm</i> <sup>+</sup> , Tet <sup>r</sup> , <i>gal</i> $\lambda$ (DE3) <i>endA</i> Hte [ <i>argU ileY leuW</i> Cam <sup>r</sup> ] | Novagen         |
| <i>T. forsythia</i> ATCC 43037 $\Delta$ <i>pseC</i>                 | <i>T. forsythia</i> knockout of the <i>pseC</i> gene; Erm <sup>r</sup>                                                                                                                                            | This study      |
| <i>T. forsythia</i> ATCC 43037 $\Delta$ <i>pseC</i> <sub>comp</sub> | Complemented <i>T. forsythia</i> ATCC 43037 $\Delta$ <i>pseC</i> ; Cat <sup>r</sup>                                                                                                                               | This study      |
| <i>T. forsythia</i> UB4 $\Delta$ <i>legC</i>                        | <i>T. forsythia</i> knockout of the <i>legC</i> gene; Erm <sup>r</sup>                                                                                                                                            | This study      |
| <i>T. forsythia</i> UB4 $\Delta$ <i>legC</i> <sub>comp</sub>        | Complemented <i>T. forsythia</i> UB4 $\Delta$ <i>legC</i> ; Cat <sup>r</sup>                                                                                                                                      | This study      |
| pJET1.2_pseC_ermF                                                   | pJET1.2 carrying the <i>pseC_P</i> (ermF)_ermF knockout cassette                                                                                                                                                  | This study      |
| pJET1.2_legC_ermF                                                   | pJET1.2 carrying the <i>legC_P</i> (ermF)_ermF knockout cassette                                                                                                                                                  | This study      |
| pJET1.2_pseC_up+gene_cat                                            | pJET1.2 carrying the <i>pseC</i> _up region, <i>pseC</i> gene and the <i>cat</i> gene                                                                                                                             | This study      |
| pJET1.2_pseC_cat                                                    | pJET1.2 carrying the <i>pseC_cat</i> complementation cassette                                                                                                                                                     | This study      |

|                          |                                                                                                      |                                           |
|--------------------------|------------------------------------------------------------------------------------------------------|-------------------------------------------|
| pJET1.2_legC_up+gene_cat | pJET1.2 carrying the <i>legC</i> _up region, <i>legC</i> gene and the <i>cat</i> gene                | This study                                |
| pJET1.2_legC_cat         | pJET1.2 carrying the <i>legC</i> _cat complementation cassette                                       | This study                                |
| pET28a                   | Expression vector with a His <sub>6</sub> -tag, Kan <sup>r</sup>                                     | Novagen                                   |
| pET22b                   | Expression vector with a His <sub>6</sub> -tag, Amp <sup>r</sup>                                     | Novagen                                   |
| pEXALV                   | <i>Paenibacillus alvei</i> expression vector used for the amplification of the <i>cat</i> gene       | (Zarschler, K., Janesch, B., et al. 2009) |
| pMAL_2cE                 | Expression vector with maltose-binding protein (N-term), Amp <sup>r</sup>                            | NEB                                       |
| pCR2.1                   | Cloning vector, Amp <sup>r</sup> , Kan <sup>r</sup> , oriColE1, <i>lac</i> promoter                  | Invitrogen                                |
| pET28a_pseB_His          | pET28a carrying the His <sub>6</sub> -tagged <i>pseB</i> gene, Kan <sup>r</sup>                      | This study                                |
| pMAL_2cE_pseC            | pMAL_2cE carrying fusion construct of maltose binding protein and <i>pseC</i> gene, Amp <sup>r</sup> | This study                                |
| pET28a_pseH_His          | pET28a carrying the His <sub>6</sub> -tagged <i>pseH</i> gene, Kan <sup>r</sup>                      | This study                                |
| pMAL_2cE_pseG            | pMAL_2cE carrying fusion construct of MBP and <i>pseG</i> gene, Amp <sup>r</sup>                     | This study                                |
| pET28a_pseI_His          | pET28a carrying the His <sub>6</sub> -tagged <i>pseI</i> gene, Kan <sup>r</sup>                      | This study                                |
| pMAL_2cE_pseF            | pMAL_2cE carrying fusion construct of MBP and <i>pseF</i> gene, Amp <sup>r</sup>                     | This study                                |
| TF2075C-pet22b           | pET22b carrying the His <sub>6</sub> -tagged <i>legB</i> gene, Amp <sup>r</sup>                      | This study                                |
| TF2074N-pet22b           | pET22b carrying the His <sub>6</sub> -tagged <i>legC</i> gene, Amp <sup>r</sup>                      | This study                                |
| BFO_1065N-pet22b         | pET22b carrying the His <sub>6</sub> -tagged <i>legG</i> gene, Amp <sup>r</sup>                      | This study                                |

**Supp. Table III.** Oligonucleotide primers used for PCR amplification reactions

| #    | Primers               | Sequence (5'→3')                                         |
|------|-----------------------|----------------------------------------------------------|
| 11   | pseB_C_NcoI_for       | aatcaCCATGGTAAATAAATAAATCCATATTGATTACCGGG                |
| 12   | pseB_C_XhoI_rev       | aatcaCTCGAGTTAATGGTGATGGTGATGGTAAATAATGAGGATCAACATATTTTC |
| 80   | pseC_BamHI_for        | aatcaGGATCCCATGATAACAAGACCGATACC                         |
| 86   | pseC_HindIII_rev      | aatcaAAGCTTCTATTGATAAAAAAATAATCACTTTCTC                  |
| 28   | pseH_C_NcoI_for new   | aatcaCCATGGCAAAAAAAGATAATTCGAAATTGGAG                    |
| 22   | pseH_N_XhoI_rev       | aatcaCTCGAGTCAGATTTTGTGATTCCTACAAAACCG                   |
| 81   | pseG_BamHI_for        | aatcaGGATCCATGGGCAACCGTCAGATTATATTTCG                    |
| 105  | pseG_HindIII_rev full | aatcaAAGCTTTTATATTCCGTGAAAAGCATGGA                       |
| 33   | pseI_C_BsaI_NcoI_for  | aatcaGGTCTCCCATGGAGACAACAATTGTAGCAGAACTATCAGC            |
| 34   | pseI_C_XhoI_rev       | aatcaCTCGAGTCAATGGTGATGGTGATGGTCTTTAATGTAACTAAGTCCAACC   |
| 23   | pseF_C_NcoI_for       | aatcaCCATGGAAATATTGGCTATTACTCAGGC                        |
| 24   | pseF_C_XhoI_rev       | aatcaCTCGAGTTAATGGTGATGGTGATGGTCTTTTAAATCAATTTATTGAC     |
| 101  | pseF_BamHI_for        | aatcaGGATCCATGAAAATATTGGCTATTACTCAGGC                    |
| 102  | pseF_XbaI_rev         | aatcaTCTAGATTATCTTATTTTAAATCATTATTTATTGAC                |
| V83  | BFO1074_synth_for     | tgcaCATAATGCAACAATACTAGTTACC                             |
| V84  | BFO1074_synth_rev     | ggcCTCGAGGGCCTCGAGCACGTTGTATATCCCGGATTTA                 |
| V133 | BFO1073_synth_for     | catgCATAATGGCCATCATCATCATCACGGCAGCATGGAGAGCAGCTATAAGAAA  |
| V134 | BFO1073_synth_rev     | catgCATGCTCGAGTCACCTTTTTCAGATTTACACTAC                   |
| V114 | BFO1065_synth_for     | gtactaCATAATGGCCATCATCATCATCACGGCAGCCGTAAGTTTGTGTTGTTACC |

|      |                      |                                                                   |
|------|----------------------|-------------------------------------------------------------------|
| V115 | BFO1065_synth_rev    | agtcac <u>CTCGAGT</u> CATTACAGGTTATAGAAGCTTTTCT                   |
| 1    | P(ermF)_for          | GGTACCCCGATAGCTTCCGGCTATTGC                                       |
| 2    | ermF_rev             | CTACGAAGGATGAAATTTTTCAGGG                                         |
| 3    | P(ermF)_rev          | GCAATAGCGGAAGCTATCGGGGGTACC                                       |
| 4    | ermF_for             | CCCTGAAAAAATTCATCCTTCGTAG                                         |
| 5    | pseC_up_for          | CCATATTGATTACCGGGGGCAC                                            |
| 6    | pseC_up_OE_rev       | GCAATAGCGGAAGCTATCGGGGGTACCCTATGCGTTAAAAATGAGGATCAAC              |
| 7    | pseC_down_OE_for     | GGAAGTTGTCCCTGAAAAAATTCATCCTTCGTAGACAGGATAAACAATCGAAAGGAAACGATTCC |
| 8    | pseC_down_rev        | CGCCGGTAAACGGTGTAGAACCATACTTGCCTGAG                               |
| 38   | KO_pseC_for3         | GTTGCTGCCCTTTTATAATTGGGATATTATGG                                  |
| 10   | KO_pseC_rev          | GCTCCCTCTTCGTTAGTCGTTGC                                           |
| 75   | cat_for neu          | ATGAACTTTAATAAAAATTGATTTAGACAATTGG                                |
| 76   | cat_rev_neu          | TTATAAAAAGCCAGTCATTAGGCCATCTGAC                                   |
| 46   | pseC_down_OE_cat_for | GGCCTAATGACTGGCTTTTATAAACAGGATATAACAATAACAATCGAAAGG               |
| 77   | cat_KpnI_SphI_rev    | aatcaGCATGCGGTACC <u>TTATAAAAGCCAGTCATTAGGCC</u> ATCTGAC          |
| 78   | pseC_down_KpnI_for   | aatcaGGTACCACAGGATATAACAATAACAATCGAAAGGAAACG                      |
| 79   | pseC_down_SphI_rev   | aatcaGCATGCGCGCGGTAAACGTGTAGAACCATATCTTGCC                        |
| 15   | pseC_C_NcoI_for      | aatcaCCATGGTAACAAGACCGGATACCATATGG                                |
| 18   | pseC_N_XhoI_rev      | aatcaCTCGAGCTATTGTATAAAAAAATTAATCACTTTCTC                         |
| 88   | legC_up_for          | GCCTTGGTTTTGTGGCAAGAAAAATC                                        |
| 89   | legC_up_OE_rev       | GCAATAGCGGAAGCTATCGGGGGTACCAGACGCTACACGTTGTATATCC                 |

|     |                    |                                                      |
|-----|--------------------|------------------------------------------------------|
| 90  | legC_down_OE_for   | CCCTGAAAAAATTTTCATCCCTTCGTAGATTATGGAAATTAAGAGTTTATTG |
| 91  | legC_down_rev      | CGCTTCCATCTGTGTGATACTTACG                            |
| 92  | KO_legC_for        | CTGCTAAGATCATATTAGTTGCTGC                            |
| 93  | KO_legC_rev        | CAGACCATTCGGGAAACTCTTCGGC                            |
| 94  | legC_down_KpnI_for | aatcaGGTACCAATATGGAATTAAGAGTTTATTG                   |
| 95  | legC_down_SphI_rev | aatcaGCATGCCGCTTCCA TCTGTTGATACTTACG                 |
| 96  | legC_OE_cat_rev    | CTAAATCAATTTTATTAAGTTCATTCACCTTTTTCAGATTTACACTAC     |
| 48  | cat_down_for       | GTCAGATAGGCCCTAATGACTGGC                             |
| V26 | BFO1073_NdeI_for   | gactCATAIGGAGAGCAGCTATAAGAAAATAACAG                  |
| V27 | BFO1073_XhoI_rev   | gcatCTCGAGCTTTTTCAGATTTACACTACTAGGG                  |
| V63 | BFO1063_NdeI_for   | gccgCATAATGATAAAATACGGATAAAAAGATTTTGG                |
| V64 | BFO1063_XhoI_rev   | gcatCTCGAGGATATAGATTGCTCCATTATATTCGTAATAAAC          |

<sup>a</sup> Introduced restriction sites are underlined, primer-encoded His-tags are in **bold**, lower case letters indicate artificially introduced bases to improve restriction enzyme cutting.
